# Supplementary material for: Oligoarylenes end-capped with carbazol-N-yl-carbazole as color tunable light-emitting and hole-transporting materials for solution-processed OLEDs
Source: Royal Society of Chemistry journal article supplement (doi:10.1039/c4ra16458j), 2015-01-01

## Supporting Information

### Oligoarylenes End-Capped with Carbazol-*N*-yl-Carbazole as Color Tunable Light-Emitting and Hole-Transporting Materials for Solution-Processed OLEDs

T. Keawin,<sup>a</sup> C. Sooksai,<sup>a</sup> N. Prachumrak,<sup>b</sup> T. Kaewpuang,<sup>b</sup> D. Muenmart,<sup>b</sup> S. Namuangruk,<sup>c</sup> S. Jungsuttiwong,<sup>a</sup> T. Sudyoadsuk<sup>a</sup> and V. Promarak<sup>b,d\*</sup>

<sup>a</sup> Department of Chemistry, Faculty of Science, Ubon Ratchathani University, Ubon Ratchathani 34190, Thailand

<sup>b</sup> School of Chemistry and Center for Innovation in Chemistry, Institute of Science, Suranaree University of Technology, Muang District, Nakhon Ratchasima 30000, Thailand

<sup>c</sup> National Nanotechnology Center, 130 Thailand Science Park, Klong Luang, Pathumthani 12120, Thailand

<sup>d</sup> PTT Group Frontier Research Center, PTT Public Company Limited, 555 Vibhavadi Rangsit Road, Chatuchak, Bangkok 10900, Thailand

→E-mail: [pvinich@sut.ac.th](mailto:pvinich@sut.ac.th)

#### Table of content

|                                                                   |            |
|-------------------------------------------------------------------|------------|
| <b>1. <i>Synthesis of 1-5</i></b>                                 | <b>S2</b>  |
| <b>2. <i>Quantum chemical calculation</i></b>                     | <b>S4</b>  |
| <b>3. <i>Multiple scan CV plots</i></b>                           | <b>S7</b>  |
| <b>4. <i>AFM images</i></b>                                       | <b>S8</b>  |
| <b>5. <i>EL spectra of the OLEDs</i></b>                          | <b>S8</b>  |
| <b>6. <i><sup>1</sup>H-NMR and <sup>13</sup>C NMR spectra</i></b> | <b>S10</b> |

## Synthesis and characterization of 1-5

### 6-Bromo-3-(3',6'-di-*tert*-butylcarbazol-*N'*-yl)-*N*-dodecylcarbazole (1)

A mixture of dodecylcarbazole (31.44 g, 63.48 mmol), 3,6-di-*tert*-butylcarbazole (4.43 g, 15.87 mmol), CuI (1.51 g, 7.94 mmol), K<sub>3</sub>PO<sub>4</sub> (8.42 g, 39.68 mmol) and  $\pm$ *trans*-1,2-diaminocyclohexane (0.90 g, 7.94 mmol) in toluene (200 ml) was stirred at refluxed under N<sub>2</sub> atmosphere for 48 h. Water (50 ml) was added and the mixture was extracted with CH<sub>2</sub>Cl<sub>2</sub> (50 ml x 2). The combined organic phase was washed with water (50 ml x 2) and brine solution (100 ml), dried over anh. Na<sub>2</sub>SO<sub>4</sub>, filtered and the solvents were removed to dryness. Purification by column chromatography over silica gel eluting with a mixture of CH<sub>2</sub>Cl<sub>2</sub> and hexane (1:5) followed by recrystallization with a mixture of CH<sub>2</sub>Cl<sub>2</sub> and methanol afforded the product (8.43 g, 77%) as a white solid (mp 176 °C). <sup>1</sup>H NMR (300 MHz, CDCl<sub>3</sub>):  $\delta$  = 8.18-8.15 (m, 4H), 7.57-7.45 (m, 3H), 7.44 (d, 2H, *J* = 1.13 Hz), 7.32-7.27 (m, 3H), 4.38 (t, 2H, *J* = 7.20 Hz), 1.96 (t, 2H, *J* = 6.90 Hz), 1.65-1.25 (m, 36H), 0.93 (t, 3H, *J* = 6.30 Hz) ppm. <sup>13</sup>C NMR (75 MHz, CDCl<sub>3</sub>):  $\delta$  = 139.29, 129.54, 128.42, 123.45, 123.42, 123.24, 111.95, 111.89, 111.31, 111.19, 111.10, 110.60, 109.54, 43.36, 31.93, 30.70, 29.95, 29.58, 29.35, 28.84, 28.28, 28.01, 12.74, 27.22, 22.71, 14.82 ppm. HRMS: *m/z* calcd. for C<sub>44</sub>H<sub>55</sub>BrN<sub>2</sub>, 690.3549; found, 692.3601 [MH<sub>2</sub><sup>+</sup>].

### 6-(Thiophen-2-yl)-3-(3',6'-di-*tert*-butylcarbazol-*N'*-yl)-*N*-dodecylcarbazole (2)

A mixture of **1** (1.00 g, 1.44 mmol), 2-thiophene boronic acid (0.09 g, 1.21 mmol), Pd(PPh<sub>3</sub>)<sub>4</sub> (0.02 g, 0.02 mmol) and 2 M Na<sub>2</sub>CO<sub>3</sub> solution (15 ml) in THF (20 ml) was degassed with N<sub>2</sub> for 3 min. The mixture was heated at reflux under N<sub>2</sub> atmosphere for 48 h. After cooling, water (50 ml) was added and the mixture was extracted with CH<sub>2</sub>Cl<sub>2</sub> (50 ml x 2). The combined organic phase was washed with water (50 ml x 2) and brine solution (50 ml), dried over anh. Na<sub>2</sub>SO<sub>4</sub>, filtered and the solvents were removed to dryness. Purification by column chromatography over silica gel eluting with a mixture of CH<sub>2</sub>Cl<sub>2</sub> and hexane (1:6) gave the product (0.85 g, 86%) as a white pearl solid (mp. 132 °C). <sup>1</sup>H NMR (300 MHz, CDCl<sub>3</sub>):  $\delta$  = 8.28 (d, 2H, *J* = 4.80 Hz), 8.20 (s, 2H), 7.79 (d, 1H, *J* = 8.40 Hz), 7.59 (q, 2H), 7.48 (m, 3H), 7.35 (m, 3H), 7.24 (s, 2H), 7.10 (t, 1H, *J* = 4.50 Hz), 4.39 (t, 2H, *J* = 7.20 Hz), 1.97 (t, 2H, *J* = 6.90 Hz), 1.56-1.27 (m, 36H), 0.87 (t, 3H, *J* = 6.90 Hz) ppm. <sup>13</sup>C NMR (75 MHz, CDCl<sub>3</sub>):  $\delta$  = 145.51, 142.44, 140.61, 140.31, 139.81, 129.64, 128.01, 126.09, 125.35, 124.88, 123.80, 123.68, 123.50, 123.07, 122.97, 122.14, 119.37, 118.05, 116.20, 109.77, 109.34, 109.19, 43.53, 34.76, 32.09, 31.93, 29.64, 29.55, 29.45, 29.36, 29.13, 27.37, 22.70, 14.13 ppm. HRMS: *m/z* calcd. for C<sub>48</sub>H<sub>58</sub>N<sub>2</sub>S, 694.4321; found, 695.4405 [MH<sup>+</sup>].

### 6-(5-Bromothiophen-2-yl)-3-(3',6'-di-*tert*-butylcarbazol-*N'*-yl)-*N*-dodecylcarbazole (3)

To a stirred solution of **2** (3.30 g, 4.75 mmol) in THF (70 ml) NBS (0.87 g, 4.98 mmol) was added in small portions. The mixture was stirred at room temperature for 3 h. Water (20 ml) was added and the mixture was extracted with CH<sub>2</sub>Cl<sub>2</sub> (50 ml x 3). The combined organic phase was washed with water (50 ml), and brine solution (50 ml), dried over anh. Na<sub>2</sub>SO<sub>4</sub>, filtered and the solvents were removed to dryness. The. Purification by column chromatography over silica gel eluting with a mixture of CH<sub>2</sub>Cl<sub>2</sub> and hexane (1:3) followed by recrystallization with a mixture of CH<sub>2</sub>Cl<sub>2</sub> and methanol afforded the product (3.33 g, 91%) as a green solid (mp. 174 °C). <sup>1</sup>H NMR (300 MHz, CDCl<sub>3</sub>):  $\delta$  = 8.26 (s, 2H), 8.21 (s, 2H), 7.69 (d, 3H, *J* = 8.40 Hz), 7.61 (d, 3H, *J* = 6.90 Hz), 7.50-7.46 (m, 3H), 7.35 (d, 2H, *J* = 8.70 Hz), 7.08-7.04 (q, 2H), 4.40 (t, 2H, *J* = 7.20 Hz), 1.98 (t, 2H, *J* = 6.90 Hz), 1.57-1.27 (m, 36H), 0.89 (t, 3H, *J* = 6.90 Hz) ppm. <sup>13</sup>C NMR (75 MHz, CDCl<sub>3</sub>):  $\delta$  = 147.02, 142.48, 140.76, 140.26, 139.81, 130.82, 129.79, 125.50, 125.30, 124.49, 123.54, 123.50, 123.08, 123.00, 122.23, 119.34, 117.80, 116.21, 110.03, 109.85, 109.47, 109.15, 43.55, 34.75, 32.08, 31.92, 29.63, 29.60, 29.53, 29.43, 29.35, 29.10, 27.35, 22.69, 14.12 ppm. HRMS: *m/z* calcd. for C<sub>48</sub>H<sub>57</sub>BrN<sub>2</sub>S, 772.3426; found, 773.3482 [MH<sup>+</sup>].

#### 6-(2,2'-Bithiophen-5-yl)-3-(3',6'-di-*tert*-butylcarbazol-*N'*-yl)-*N*-dodecylcarbazole (4)

Compound **4** (1.35 g, 80%) was synthesized in similar manner to **2** from **3** and obtained as a pale yellow solid (mp. 142 °C). <sup>1</sup>H NMR (300 MHz, CDCl<sub>3</sub>): δ = 8.27 (s, 2H), 8.20 (s, 2H), 7.78 (d, 1H, *J* = 8.40 Hz), 7.60 (q, 2H), 7.49-7.46 (m, 3H), 7.36 (d, 2H, *J* = 8.4 Hz), 7.27-7.16 (m, 3H), 7.03 (t, 1H, *J* = 3.9 Hz), 4.39 (t, 2H, *J* = 7.20 Hz), 1.97 (t, 2H, *J* = 6.90 Hz), 1.50-1.27 (m, 36H), 0.89 (t, 3H, *J* = 6.90 Hz) ppm. <sup>13</sup>C NMR (75 MHz, CDCl<sub>3</sub>): δ = 144.35, 142.46, 140.68, 140.28, 139.81, 137.73, 135.62, 129.74, 127.81, 125.71, 125.39, 124.68, 124.50, 124.02, 123.64, 123.50, 123.29, 123.08, 123.03, 122.66, 119.34, 117.73, 116.19, 109.81, 109.41, 109.19, 43.55, 34.75, 32.08, 31.92, 29.63, 29.60, 29.54, 29.43, 29.35, 29.12, 27.36, 22.69, 14.12 ppm. HRMS: *m/z* calcd. for C<sub>52</sub>H<sub>60</sub>N<sub>2</sub>S<sub>2</sub>, 776.4198; found, 777.4290 [MH<sup>+</sup>].

#### 6-(5'-Bromo-2,2'-bithiophen-5-yl)-3-(3',6'-di-*tert*-butylcarbazol-*N'*-yl)-*N*-dodecylcarbazole (5)

Compound **5** (93%) was synthesized in similar manner to **3** from **4** and obtained as a green solid (mp. 234 °C). <sup>1</sup>H NMR (300 MHz, CDCl<sub>3</sub>): δ = 8.24 (s, 2H), 8.17 (s, 2H), 7.74 (d, 1H, *J* = 5.58 Hz), 7.59-7.57 (m, 2H), 7.47 (d, 3H, *J* = 8.60 Hz), 7.33 (d, 3H, *J* = 8.60 Hz), 7.21 (d, 1H, *J* = 3.72 Hz), 7.10 (d, 1H, *J* = 3.72 Hz), 6.97-6.90 (q, 2H), 4.37 (t, 2H, *J* = 7.20 Hz), 1.98 (t, 2H, *J* = 6.90 Hz), 1.57-1.27 (m, 36H), 0.85 (t, 3H, *J* = 6.90 Hz) ppm. <sup>13</sup>C NMR (75 MHz, CDCl<sub>3</sub>): δ = 144.90, 142.48, 140.75, 140.26, 139.81, 139.22, 134.50, 130.64, 129.78, 125.45, 124.95, 124.50, 123.59, 123.50, 123.30, 123.08, 122.69, 119.34, 117.79, 116.21, 110.48, 109.85, 109.45, 109.17, 43.55, 34.75, 32.08, 31.92, 30.92, 29.63, 29.60, 29.54, 29.43, 29.35, 29.11, 27.36, 22.70, 14.12 ppm. HRMS: *m/z* calcd. for C<sub>52</sub>H<sub>59</sub>BrN<sub>2</sub>S<sub>2</sub>, 854.3303; found, 855.3364 [MH<sup>+</sup>].

### Quantum chemical calculation

- All calculations were performed by Gaussian 09 code
- Geometry optimizations were done by B3LYP/6-31G(d,p) method
- Ground to excited state excitation energies were calculated by TD-B3LYP/6-31G(d,p) in  $\text{CH}_2\text{Cl}_2$  solvent

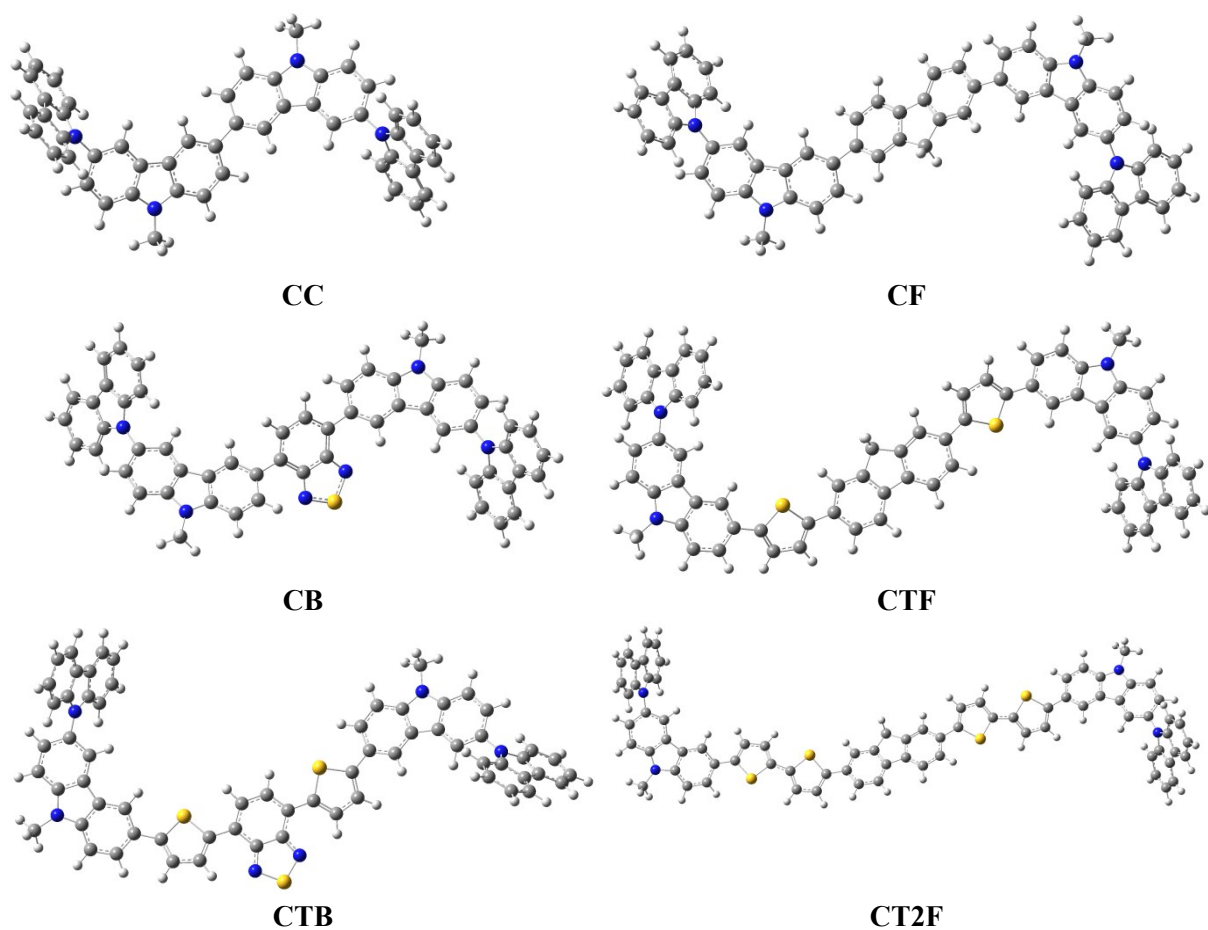

**Figure S1.** The optimized structure of the compounds calculated by B3LYP/6-31G(d,p) in  $\text{CH}_2\text{Cl}_2$ .

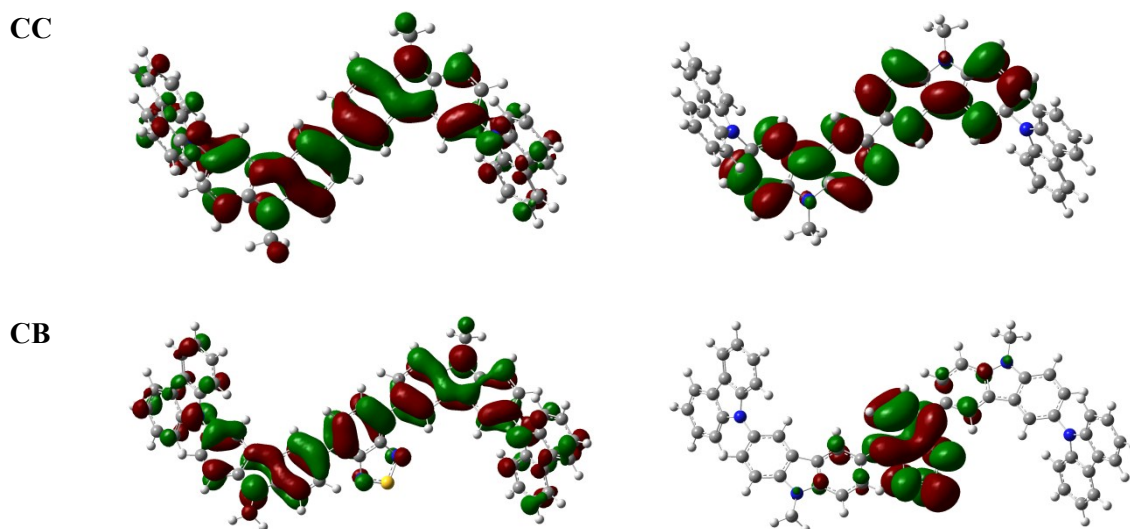

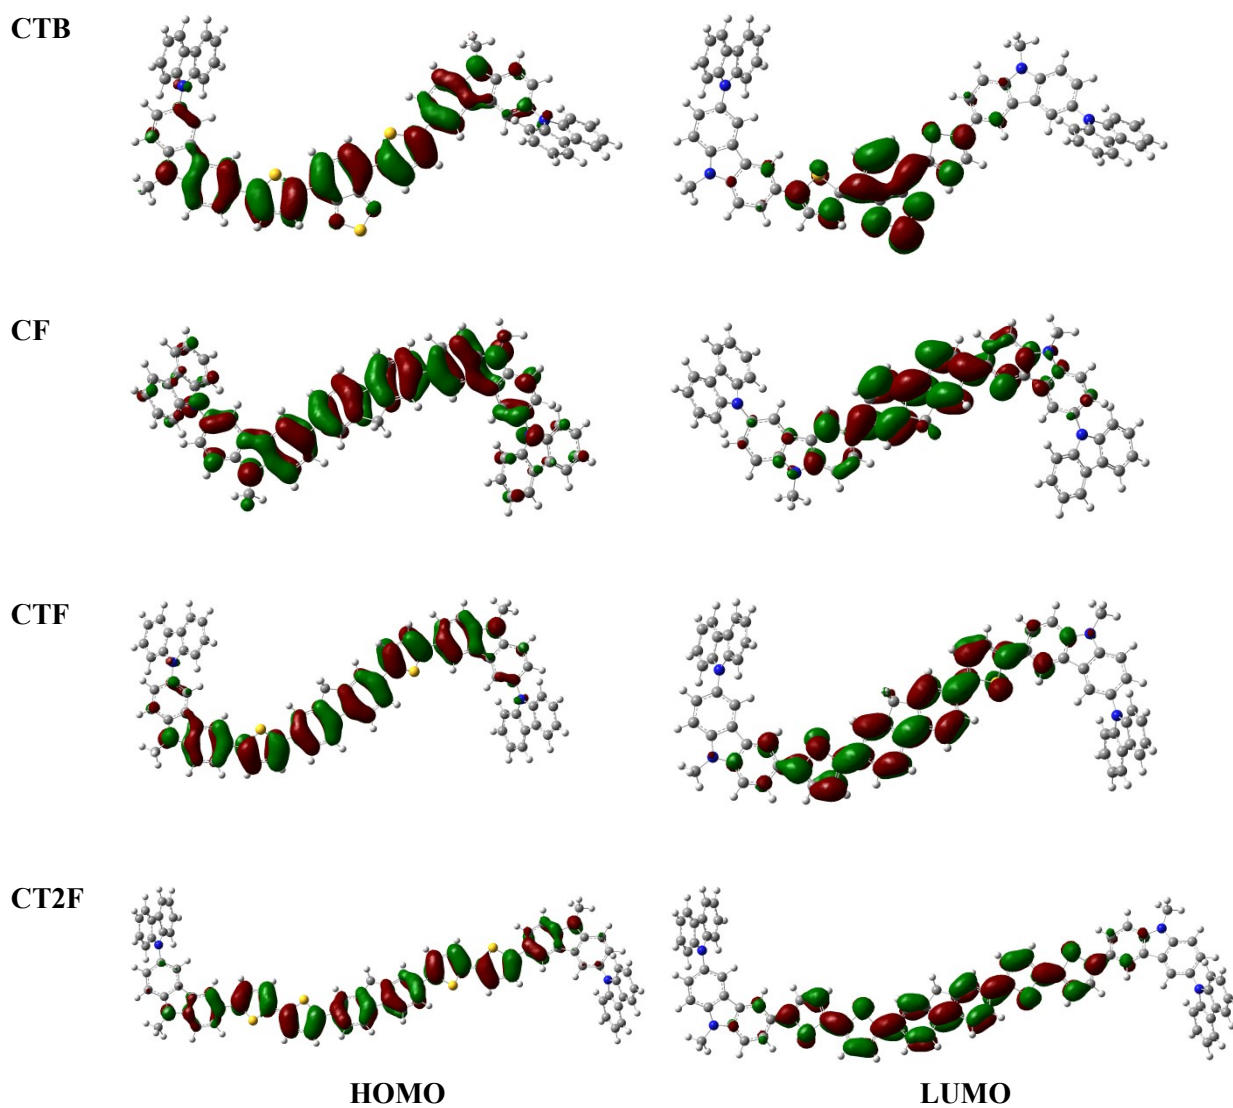

**Figure S2.** HOMO and LUMO of the compounds calculated by B3LYP/6-31G(d,p) in CH<sub>2</sub>Cl<sub>2</sub>.

**Table S1.** The calculated HOMO, LUMO and HOMO-LUMO energy gap ( $\Delta_{H-L}$ ) of the compounds by B3LYP/6-31G(d,p).

| Compounds | HOMO (eV) | LUMO (eV) | $\Delta_{H-L}$ (eV) | $E_{ex}^a$ (eV/nm) |
|-----------|-----------|-----------|---------------------|--------------------|
| CC        | -5.16     | -1.05     | 4.11                | 3.47 (357)         |
| CB        | -5.21     | -2.39     | 2.83                | 2.37 (522)         |
| CTB       | -4.98     | -2.67     | 2.30                | 1.91 (647)         |
| CF        | -5.15     | -1.23     | 3.92                | 3.35 (370)         |
| CTF       | -4.98     | -1.74     | 3.24                | 2.81 (441)         |
| CT2F      | -4.90     | -1.99     | 2.91                | 2.50 (496)         |

<sup>a</sup> excitation energies from ground to excited states are calculated by TD-B3LYP/6-31G(d,p) in CH<sub>2</sub>Cl<sub>2</sub> solvent

**Table S2.** The three lowest excitations of from ground to excited states are calculated by TD-B3LYP/6-31G(d,p) in CH<sub>2</sub>Cl<sub>2</sub> solvent

| Compounds   |                                | E <sub>ex</sub> <sup>a</sup><br>(eV/nm) | Oscillator<br>strength (f) | Transition                |
|-------------|--------------------------------|-----------------------------------------|----------------------------|---------------------------|
| <b>CC</b>   | S <sub>0</sub> →S <sub>1</sub> | 3.57 (347)                              | 0.0038                     | H→L (67%)                 |
|             | S <sub>0</sub> →S <sub>2</sub> | 3.62 (342)                              | 0.0409                     | H→L+1 (67%)               |
|             | S <sub>0</sub> →S <sub>3</sub> | 3.86 (321)                              | 0.1714                     | H-1→L (54%) + H-2→L (35%) |
| <b>CB</b>   | S <sub>0</sub> →S <sub>1</sub> | 2.37 (522)                              | 0.3894                     | H→L (69%)                 |
|             | S <sub>0</sub> →S <sub>2</sub> | 2.63 (471)                              | 0.0023                     | H-1→L (70%)               |
|             | S <sub>0</sub> →S <sub>3</sub> | 2.77 (447)                              | 0.0575                     | H-2→L (68%)               |
| <b>CTB</b>  | S <sub>0</sub> →S <sub>1</sub> | 1.91 (647)                              | 0.9203                     | H→L (70%)                 |
|             | S <sub>0</sub> →S <sub>2</sub> | 2.38 (521)                              | 0.0363                     | H-1→L (69%)               |
|             | S <sub>0</sub> →S <sub>3</sub> | 2.50 (496)                              | 0.0131                     | H-2→L (70%)               |
| <b>CF</b>   | S <sub>0</sub> →S <sub>1</sub> | 3.45 (359)                              | 1.8677                     | H→L (69%)                 |
|             | S <sub>0</sub> →S <sub>2</sub> | 3.60 (344)                              | 0.0031                     | H→L+1 (59%)               |
|             | S <sub>0</sub> →S <sub>3</sub> | 3.61 (344)                              | 0.1441                     | H→L+2 (59%)               |
| <b>CTF</b>  | S <sub>0</sub> →S <sub>1</sub> | 2.81 (441)                              | 2.4444                     | H→L (69%)                 |
|             | S <sub>0</sub> →S <sub>2</sub> | 3.20 (387)                              | 0.0286                     | H-1→L (69%)               |
|             | S <sub>0</sub> →S <sub>3</sub> | 3.41 (364)                              | 0.0705                     | H-2→L (68%)               |
| <b>CT2F</b> | S <sub>0</sub> →S <sub>1</sub> | 2.50 (496)                              | 3.3319                     | H→L (69%)                 |
|             | S <sub>0</sub> →S <sub>2</sub> | 2.49 (439)                              | 0.0684                     | H-1→L+1 (67%)             |
|             | S <sub>0</sub> →S <sub>3</sub> | 2.97 (417)                              | 0.0276                     | H→L+1 (67%)               |

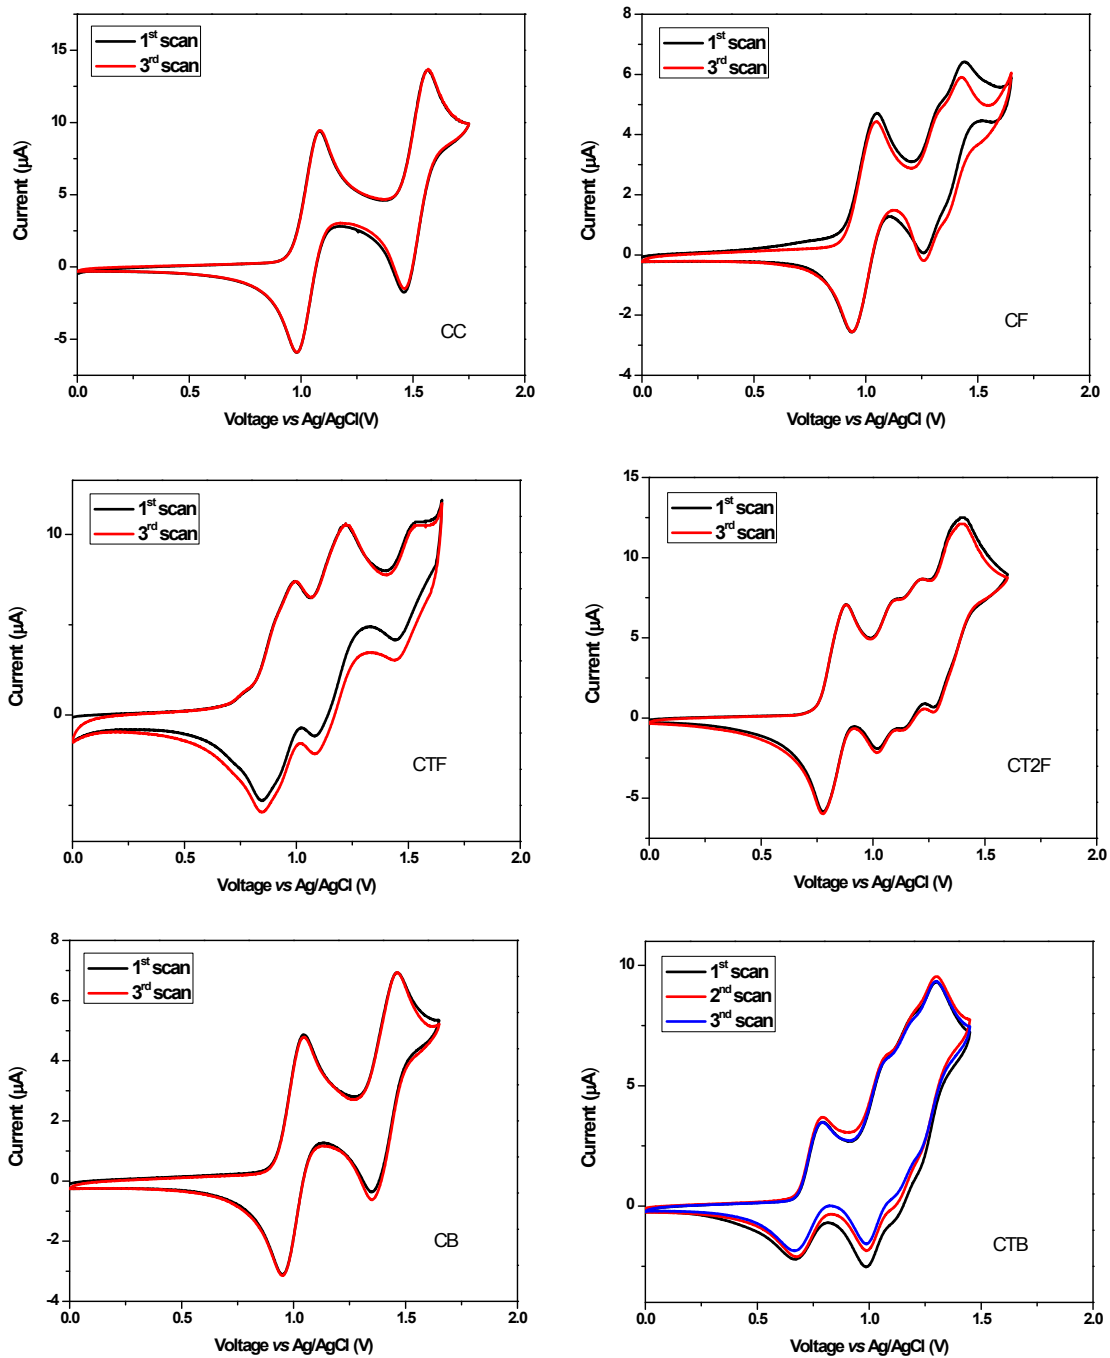

Figure S3. Multiple scan CV traces.

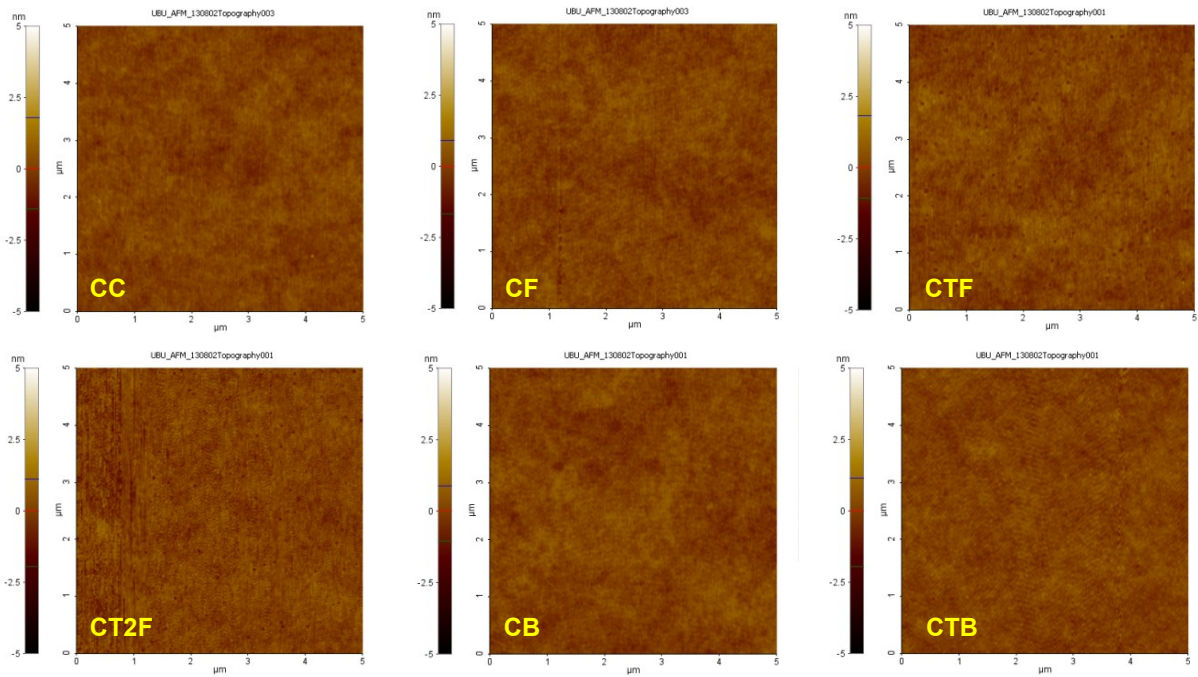

**Figure S4.** Tapping mode AFM images of the spin-coated thin films.

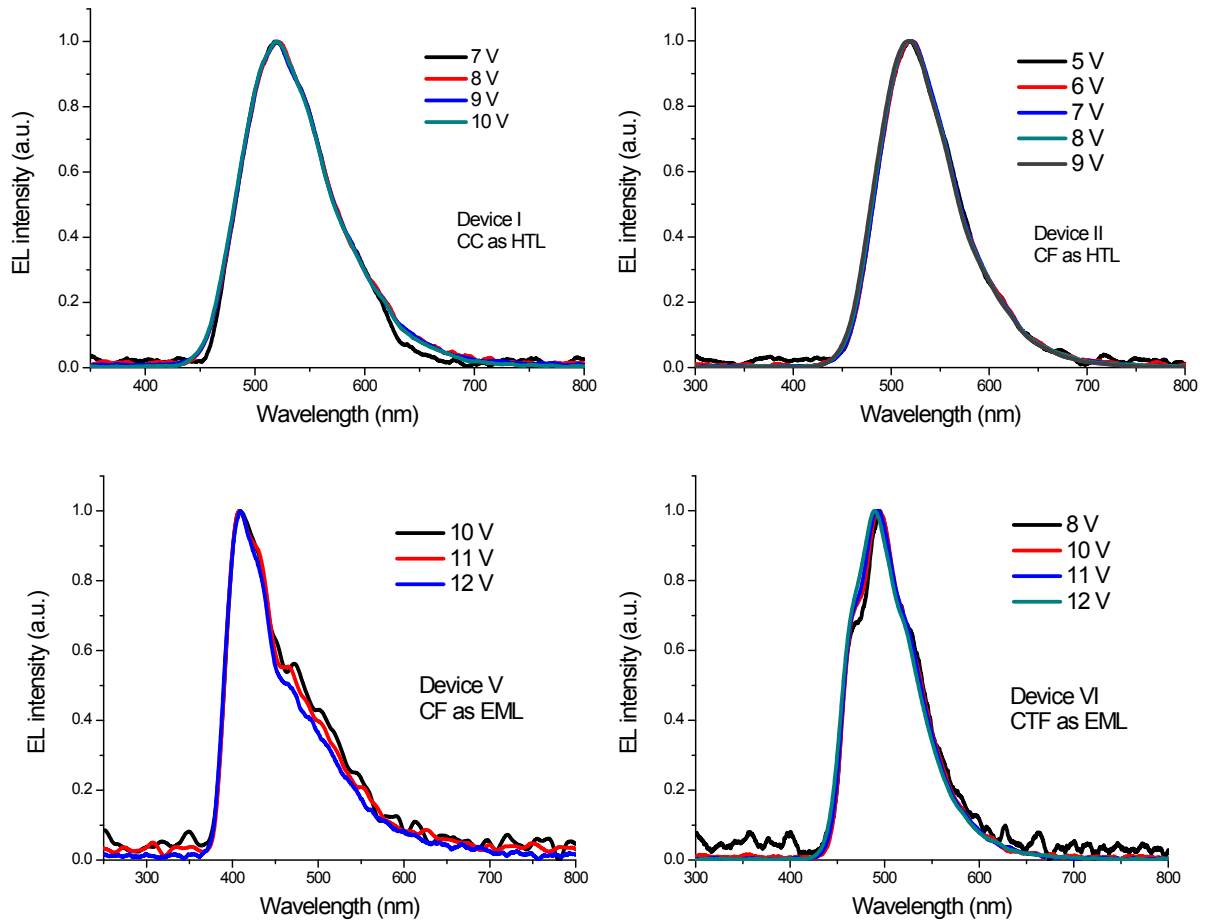



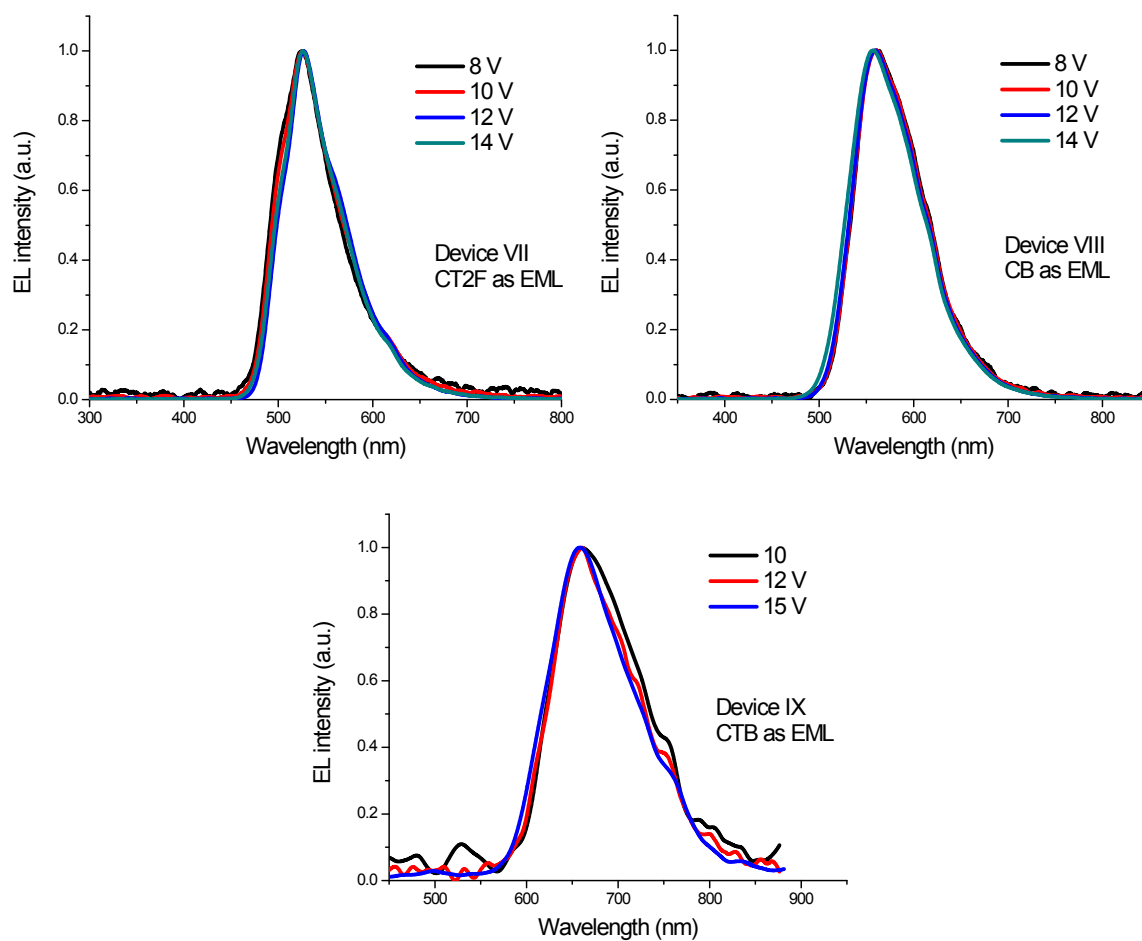

**Figure S5.** EL spectra of the OELDs at different applied voltages.

# <sup>1</sup>H-NMR and <sup>13</sup>C NMR spectra Compound CC

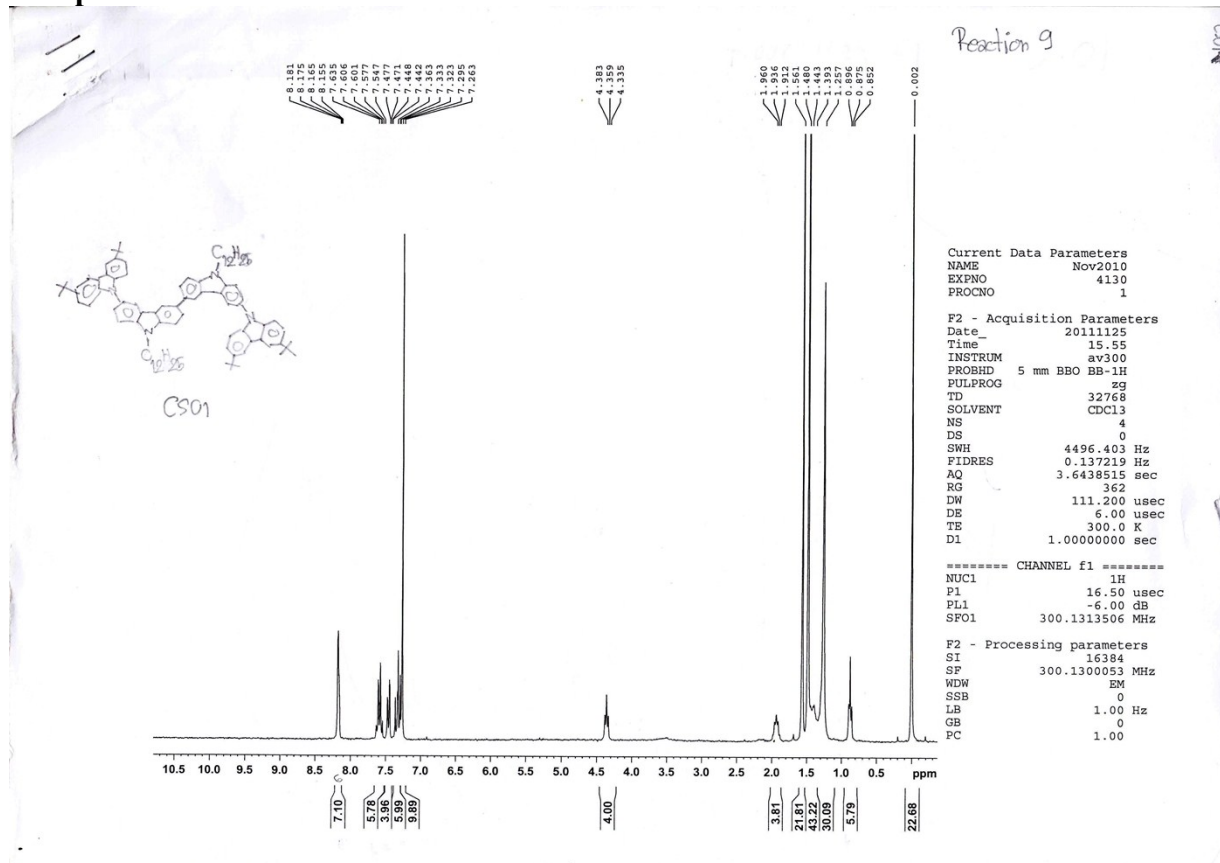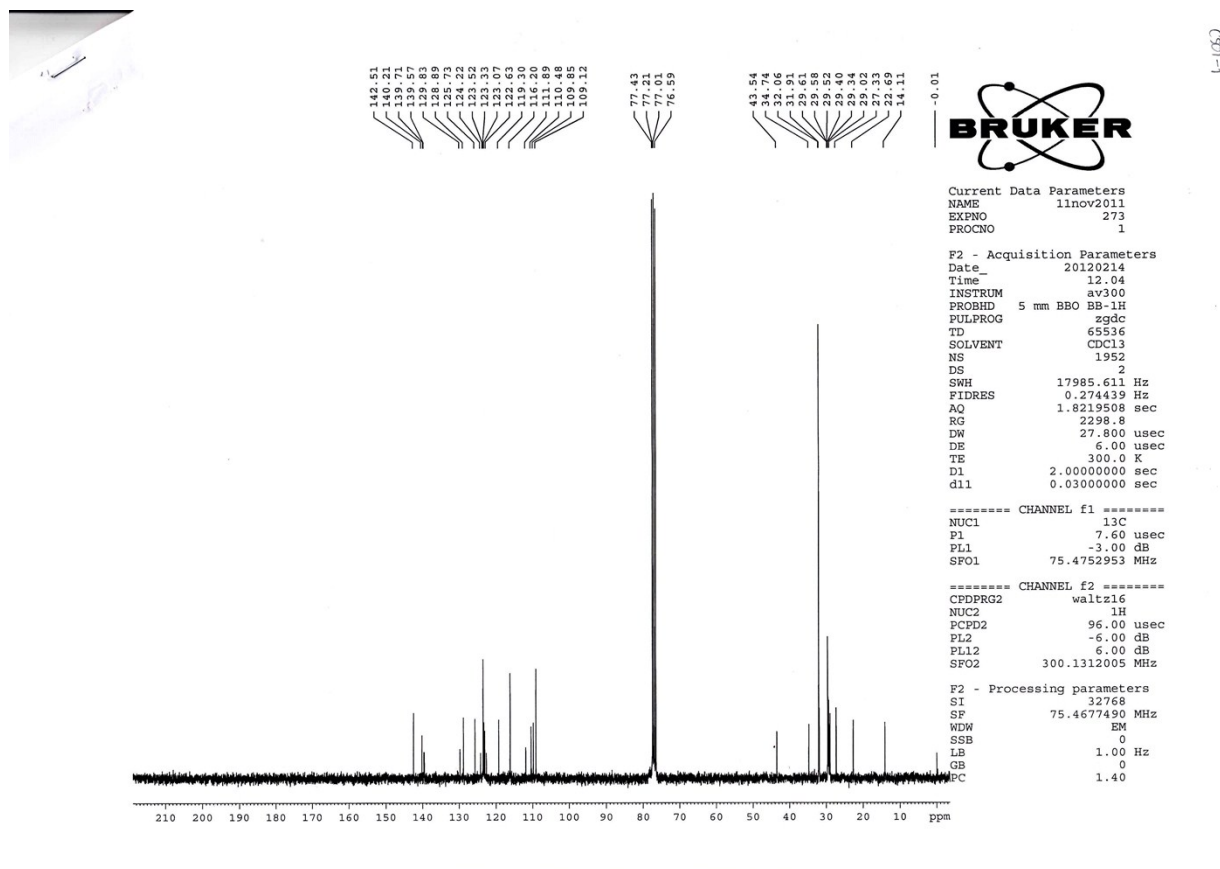

Compound CF

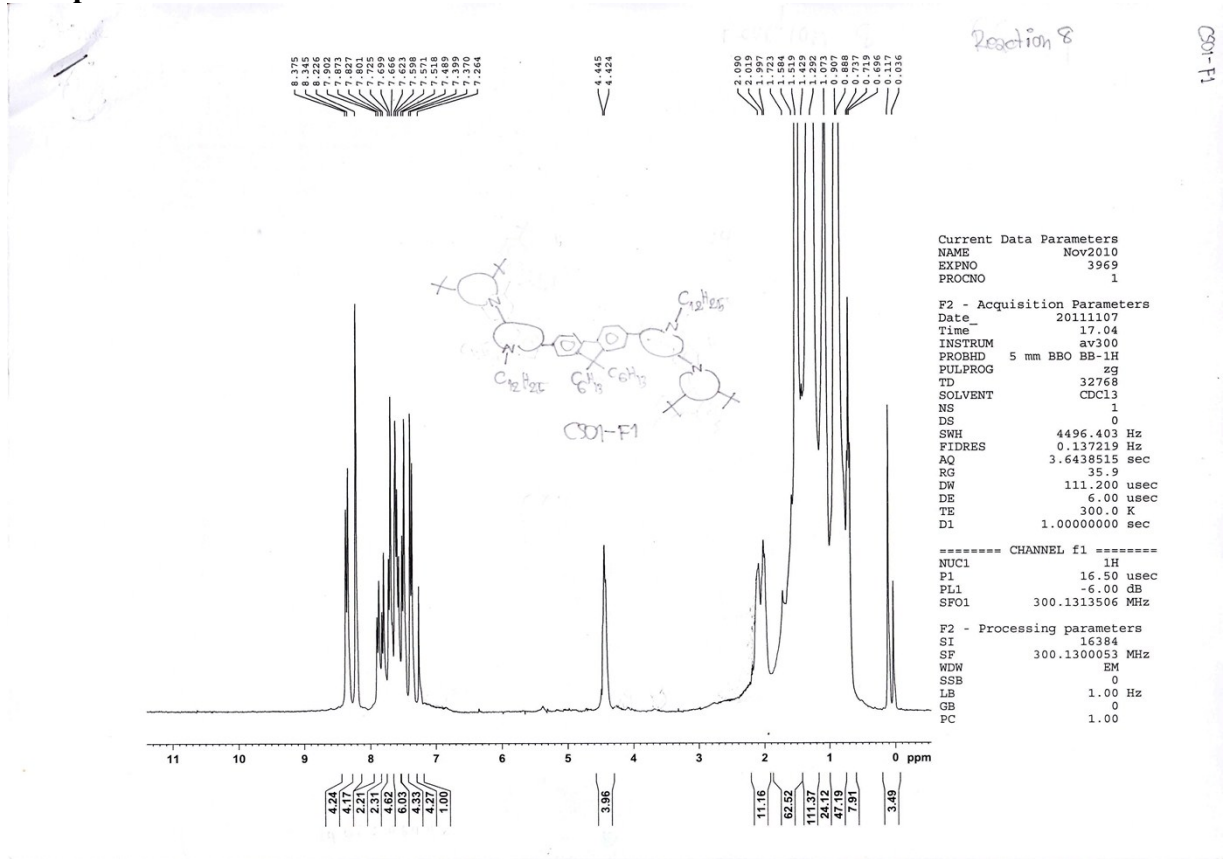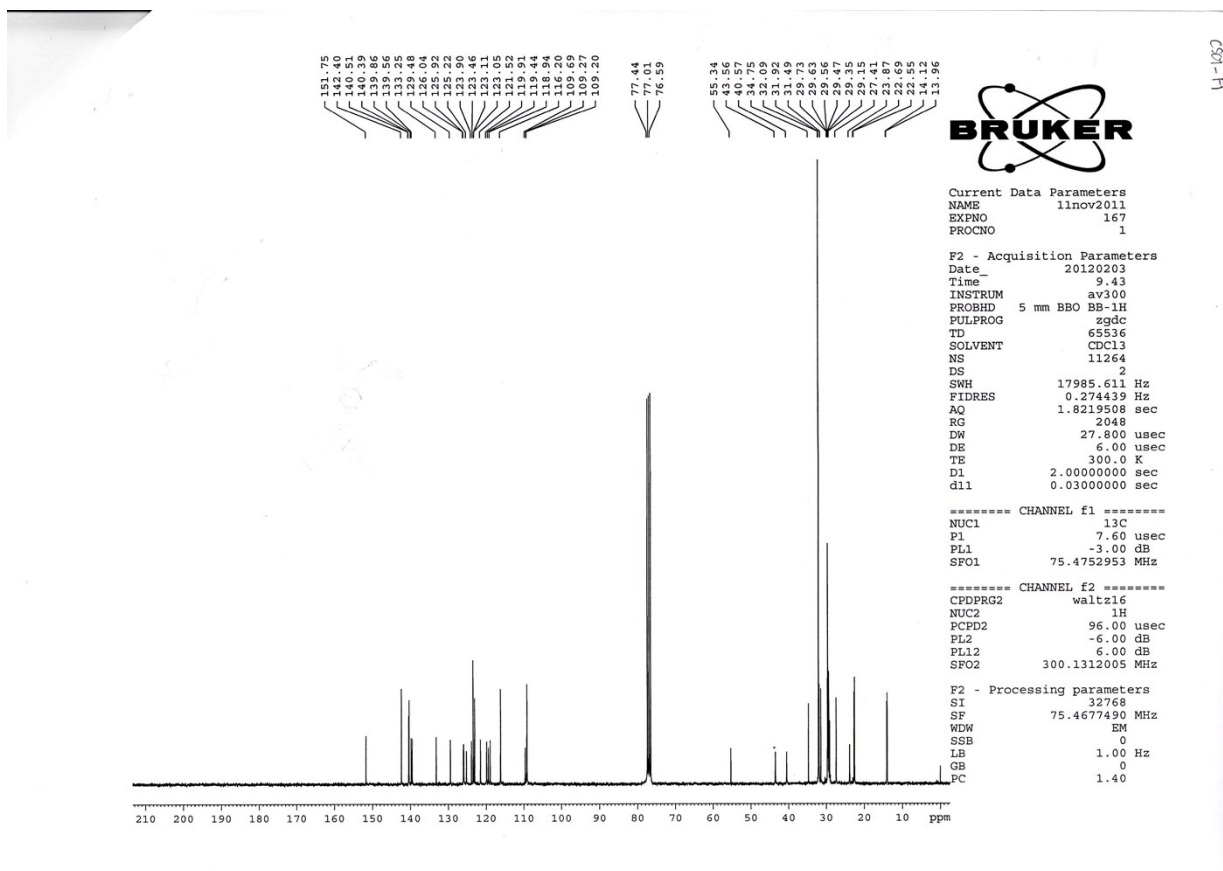

Compound CTF

C01-F2

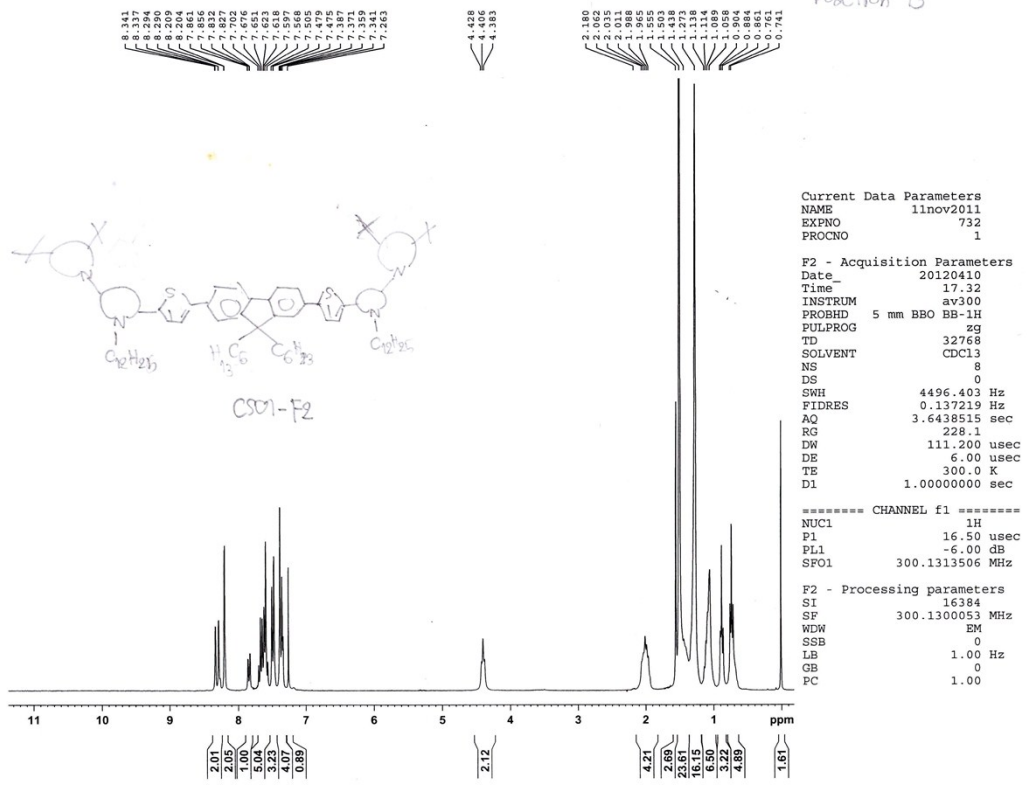

C01-F2

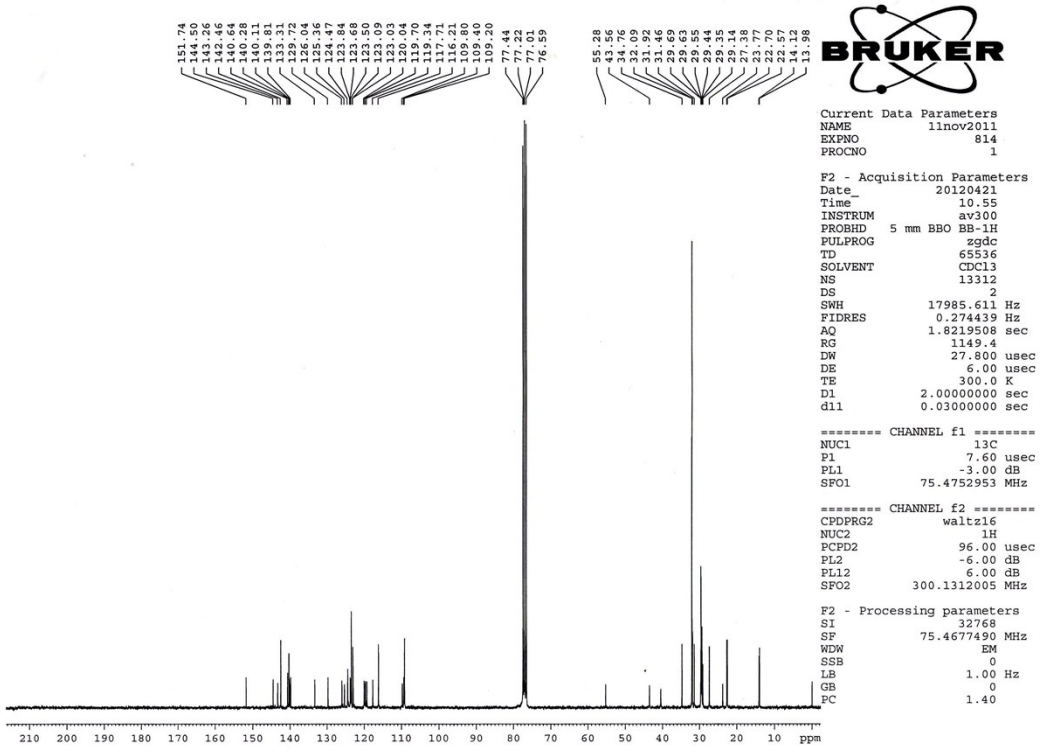

Compound CT2F

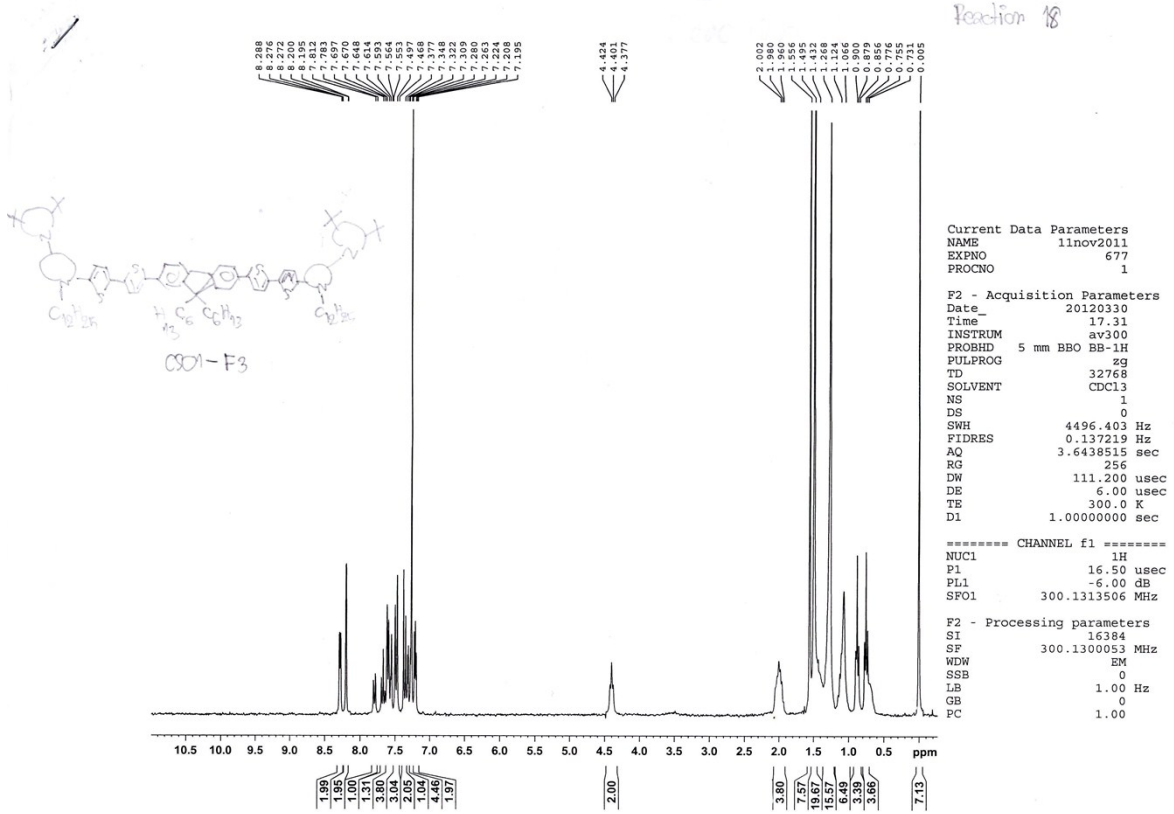

CS01-F3

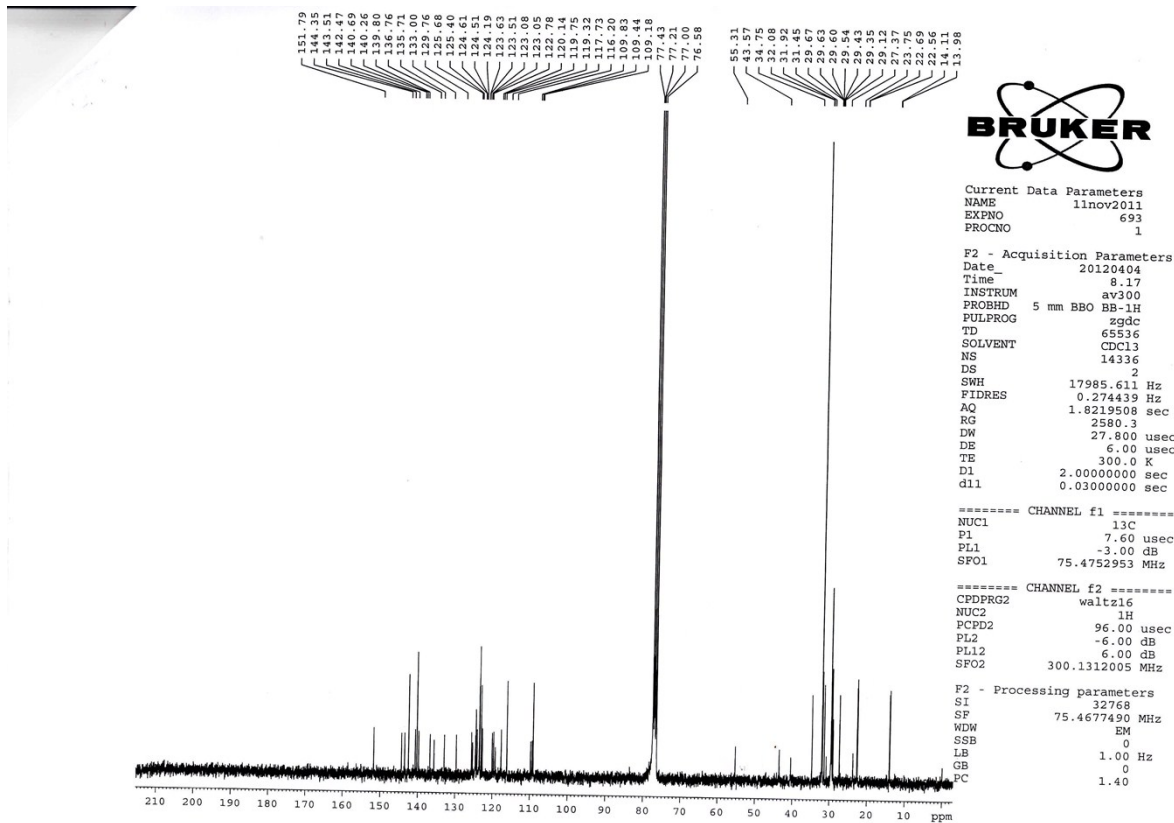

CS01-F3

Compound CB

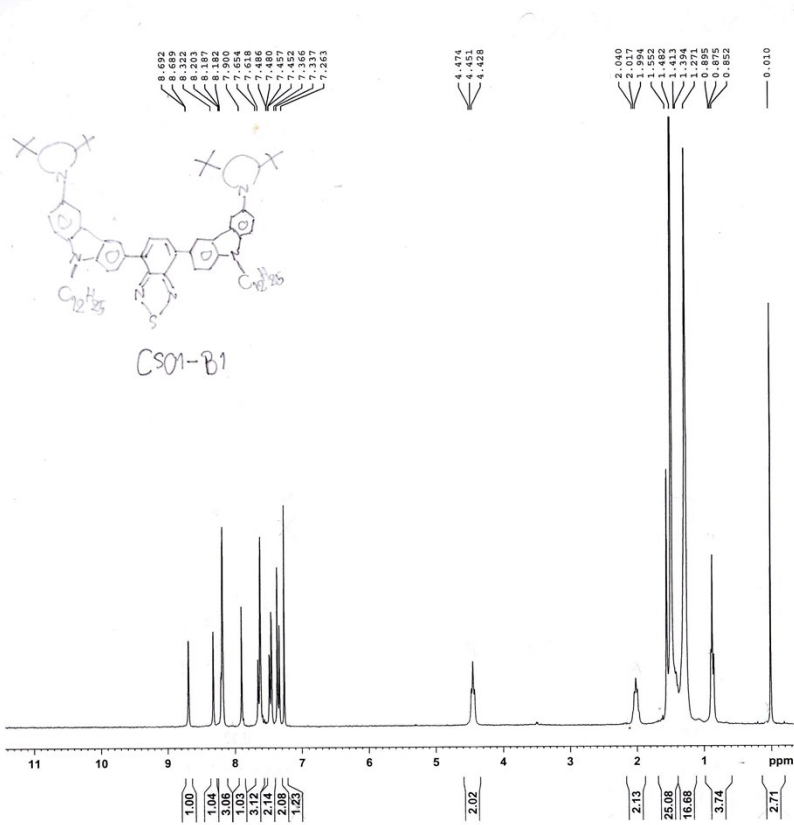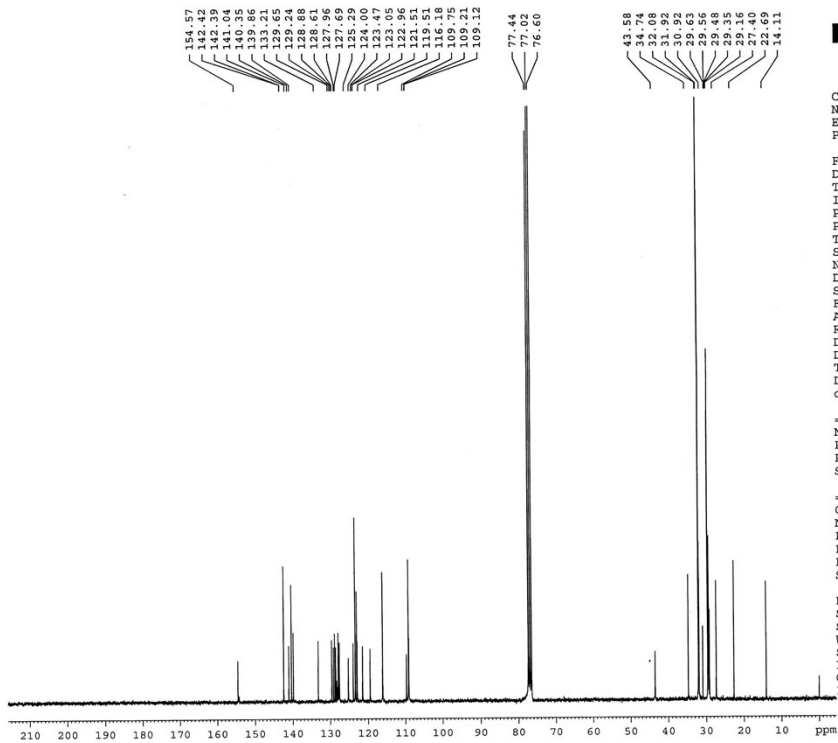



Compound CTB

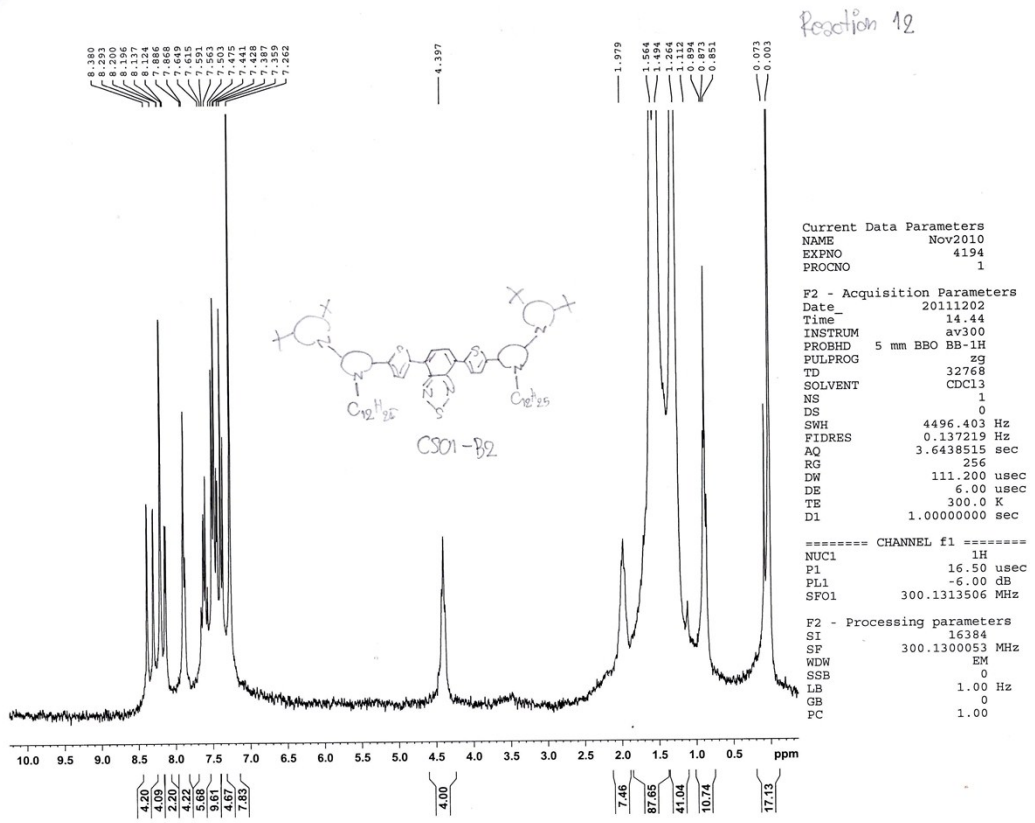

CS01-B2

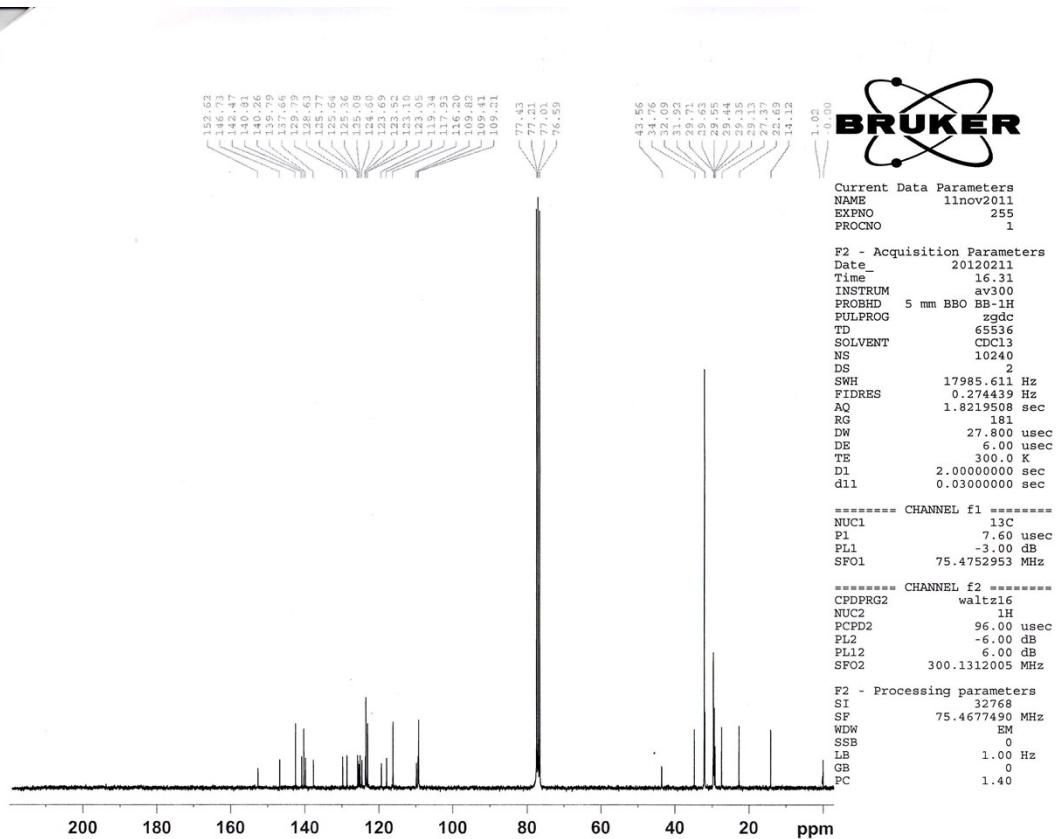

CS01-B2

Compound 2

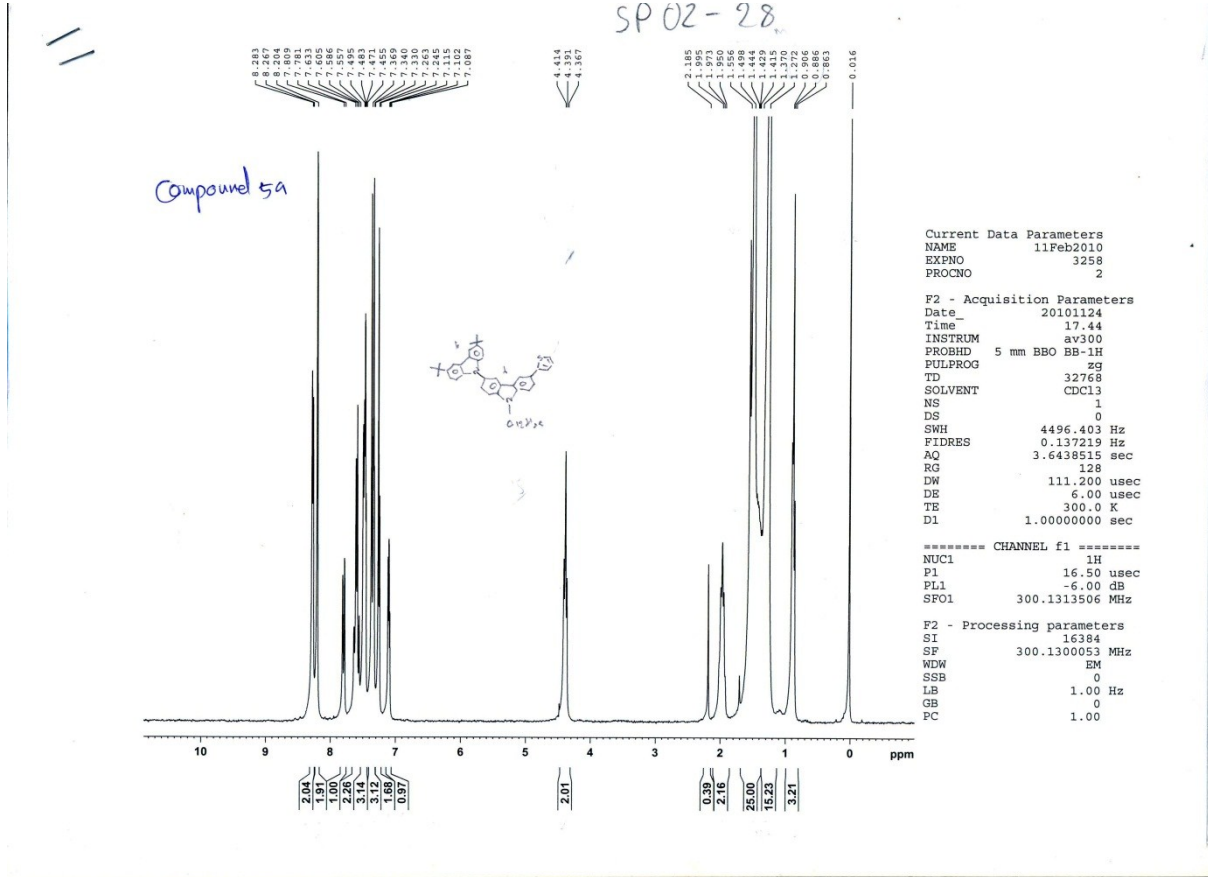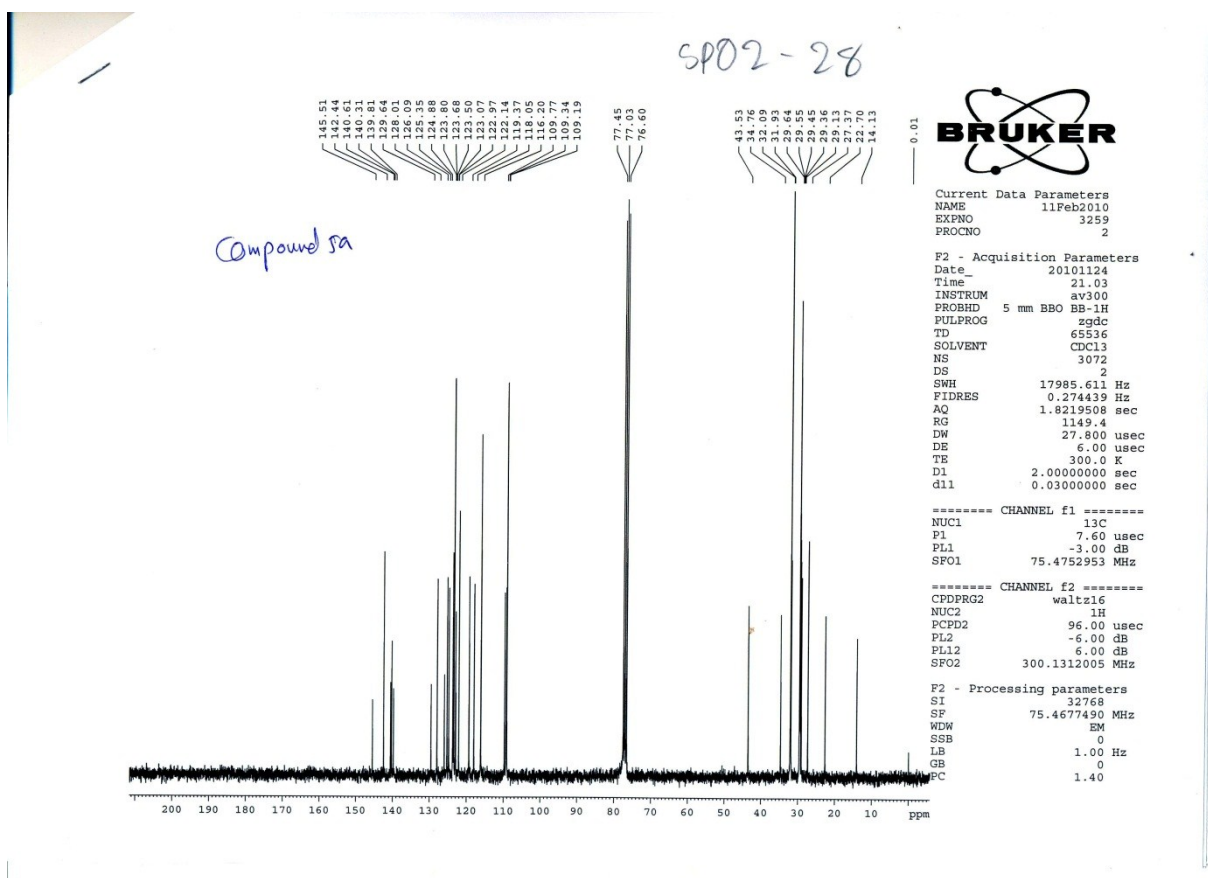



Compound 3

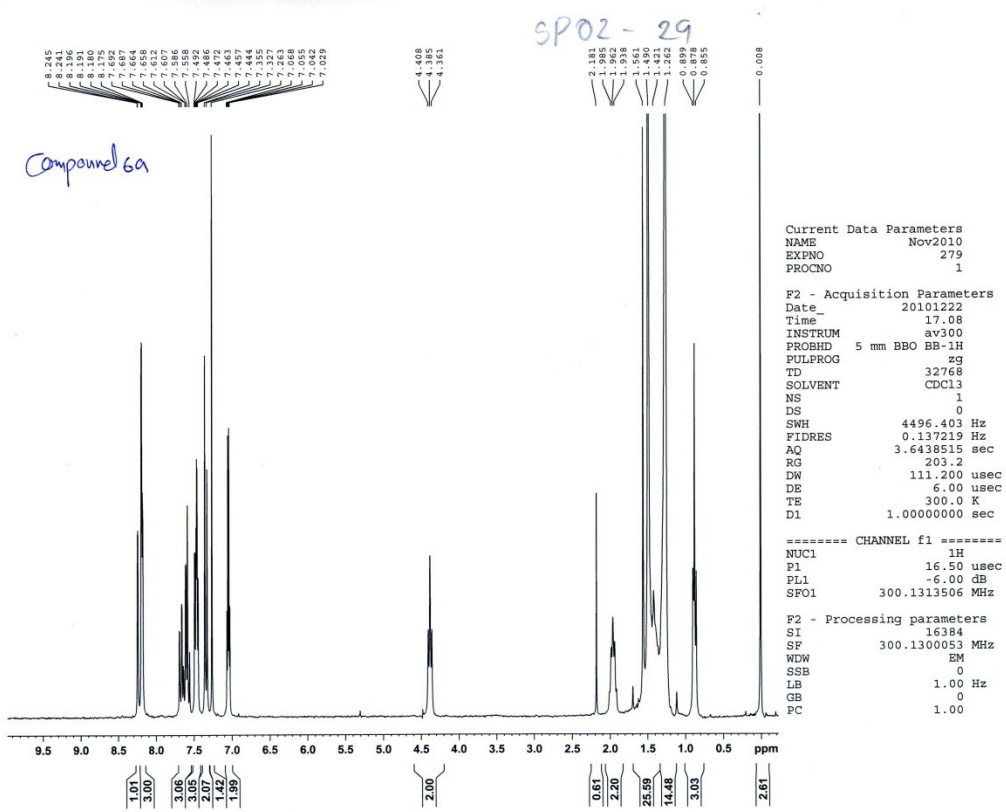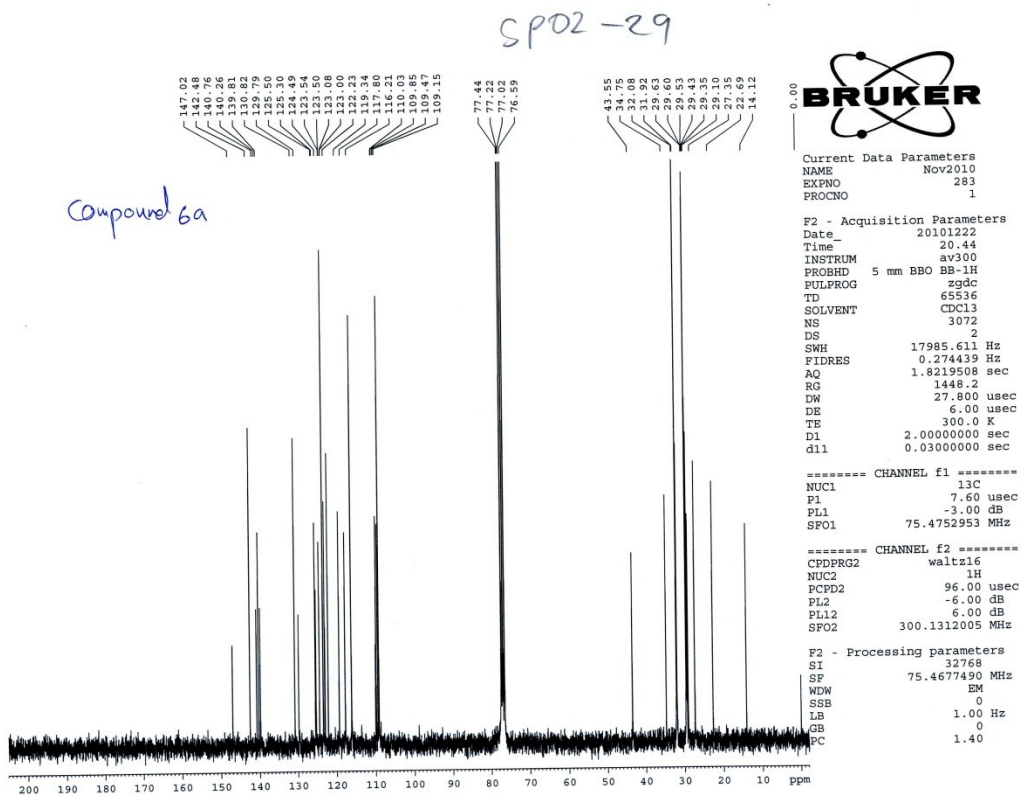

Compound 4

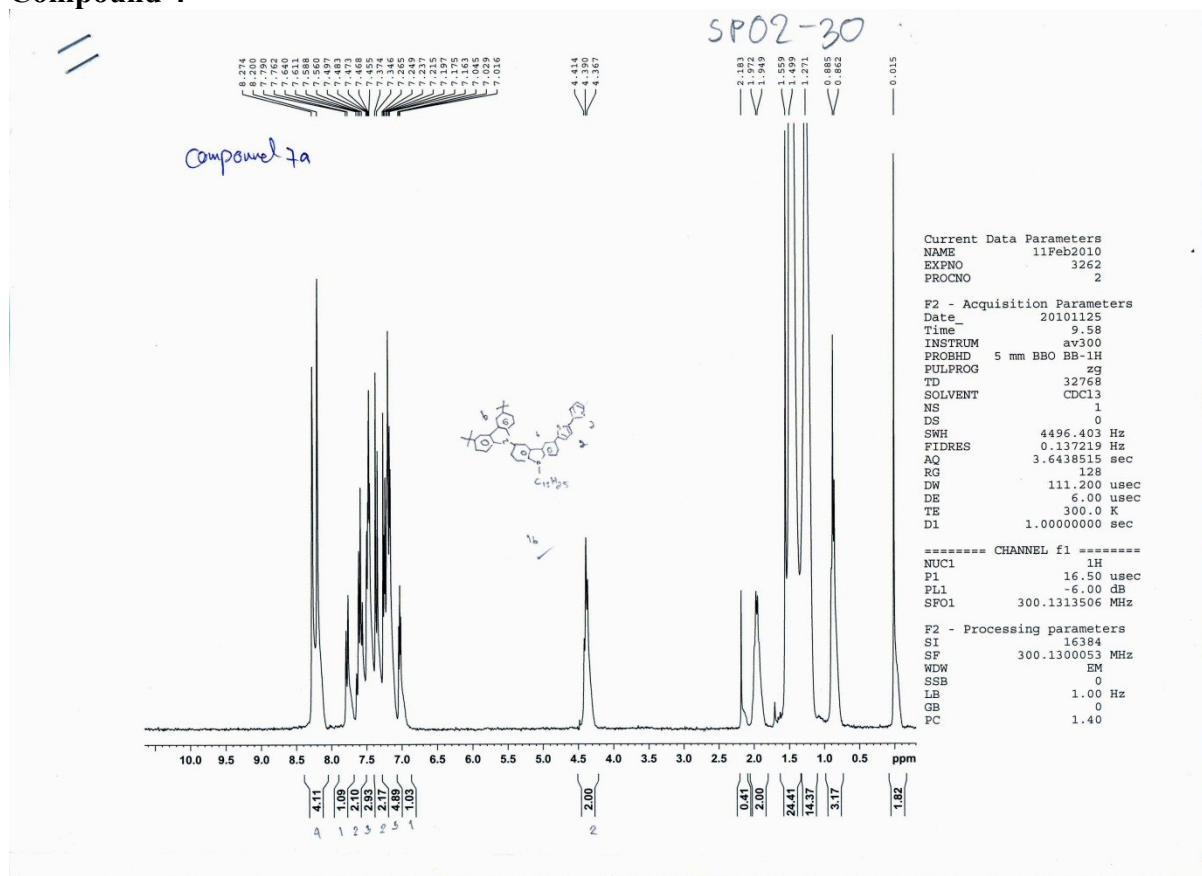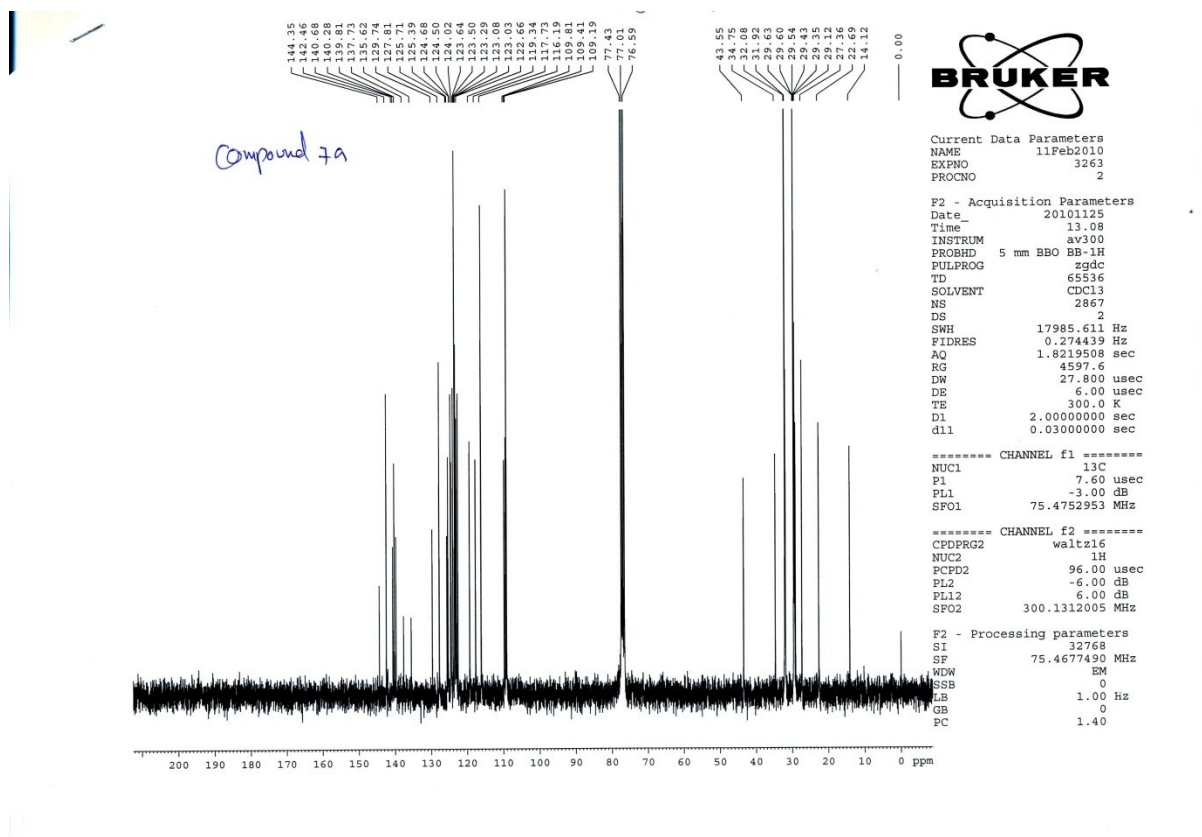

Compound 5

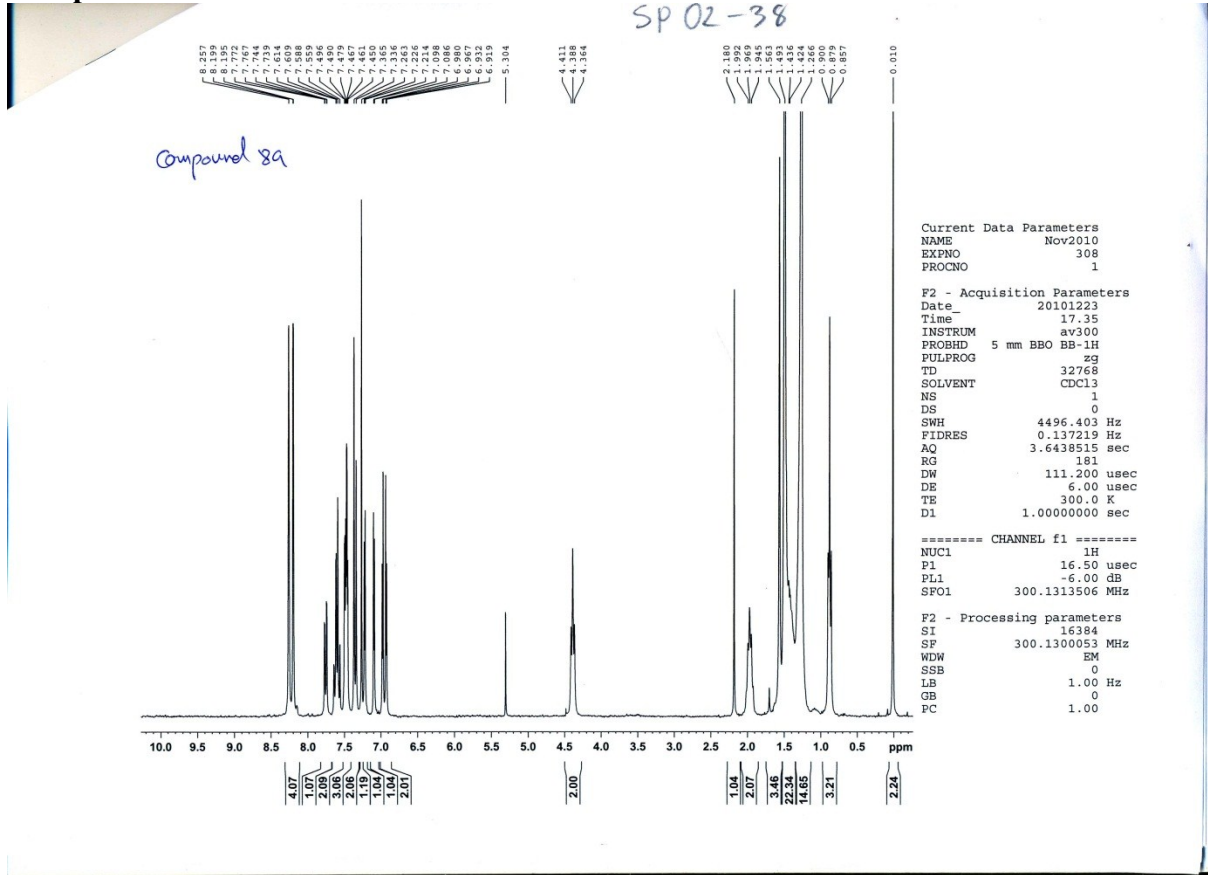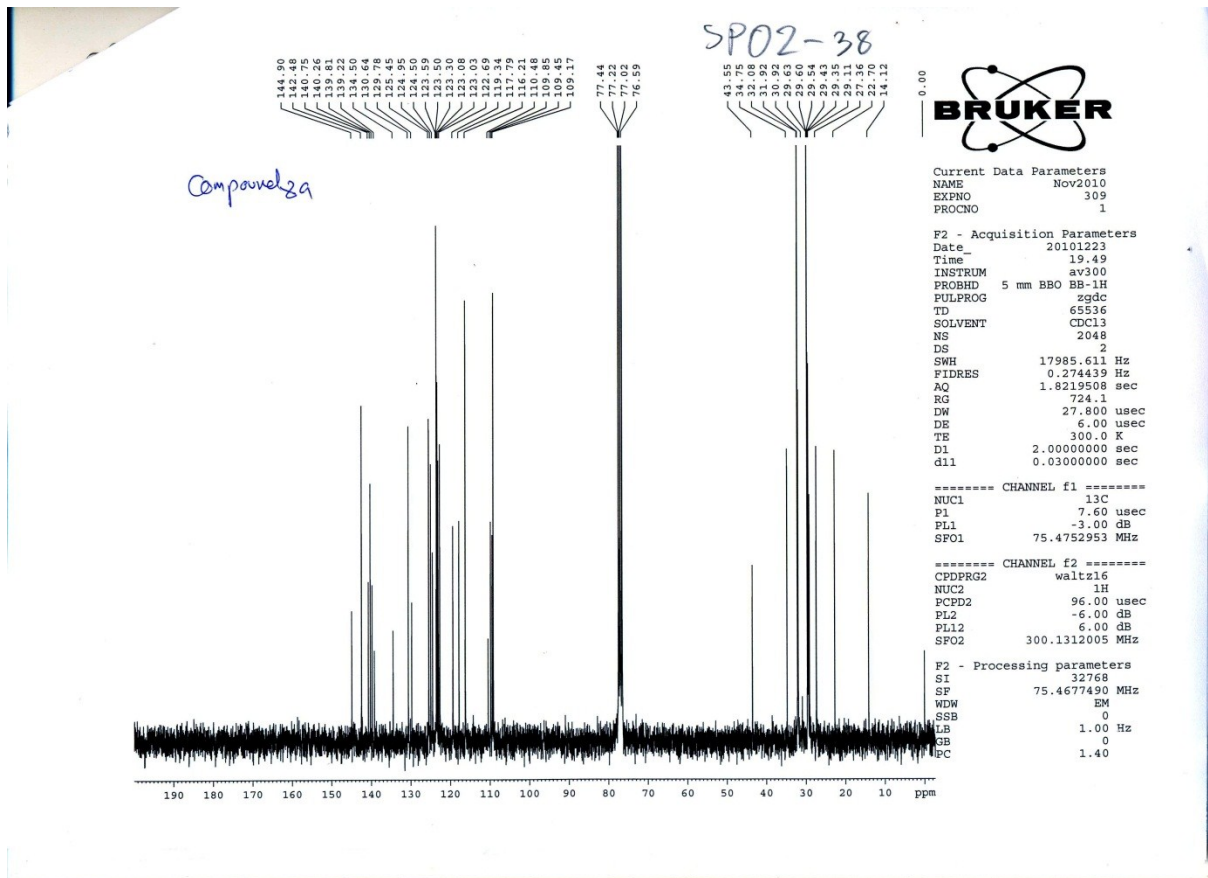

Supplement: c4ra16458j1.pdf [file c4ra16458j1.pdf]
